# Supplementary material for: Diverse actions of sirtuin-1 on ovulatory genes and cell death pathways in human granulosa cells
Source: PubMed Central journal article supplement (PMC9284863; doi:10.1186/s12958-022-00970-x), 2022-07-15

### **Original western blots**

In the additional files we have provided original unedited western blots images indicating the proteins we probed for. The highlighted sections, marked with red rectangles, in the original images indicate sections used to create final figures shown in this report. The calculations were based on each protein being normalized to its respective MAPK.

**Figure 5**

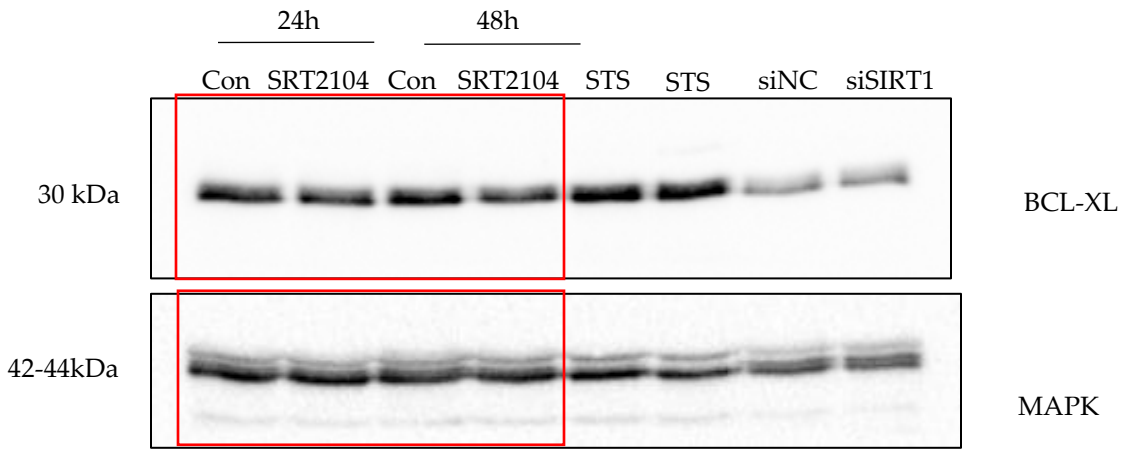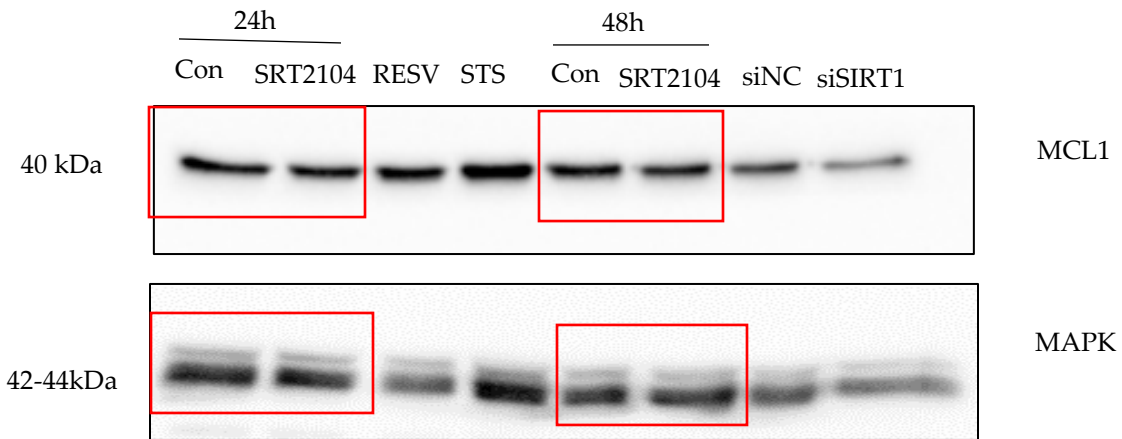

**Figure 5C**

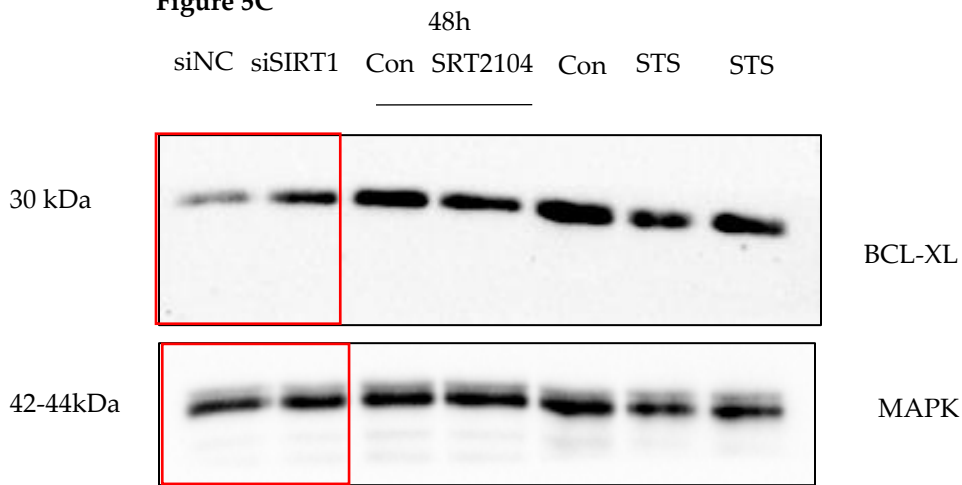

**Figure 6E**

In figure 6E, lane 3 was spliced out (since we do not show resveratrol here) and lanes 2 and 4 were joined in the final images shown in the report.

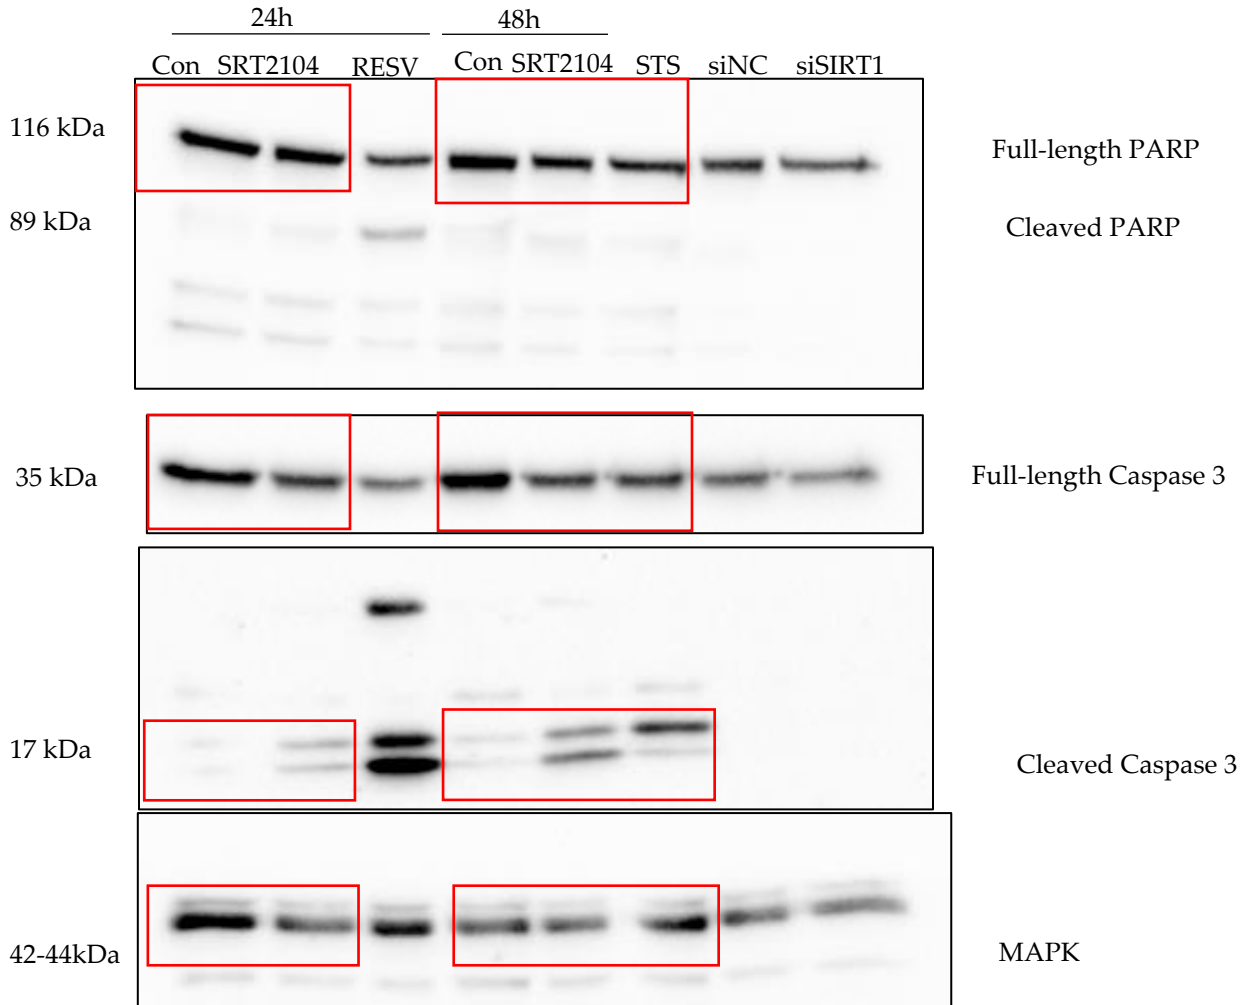





**Figure 7**

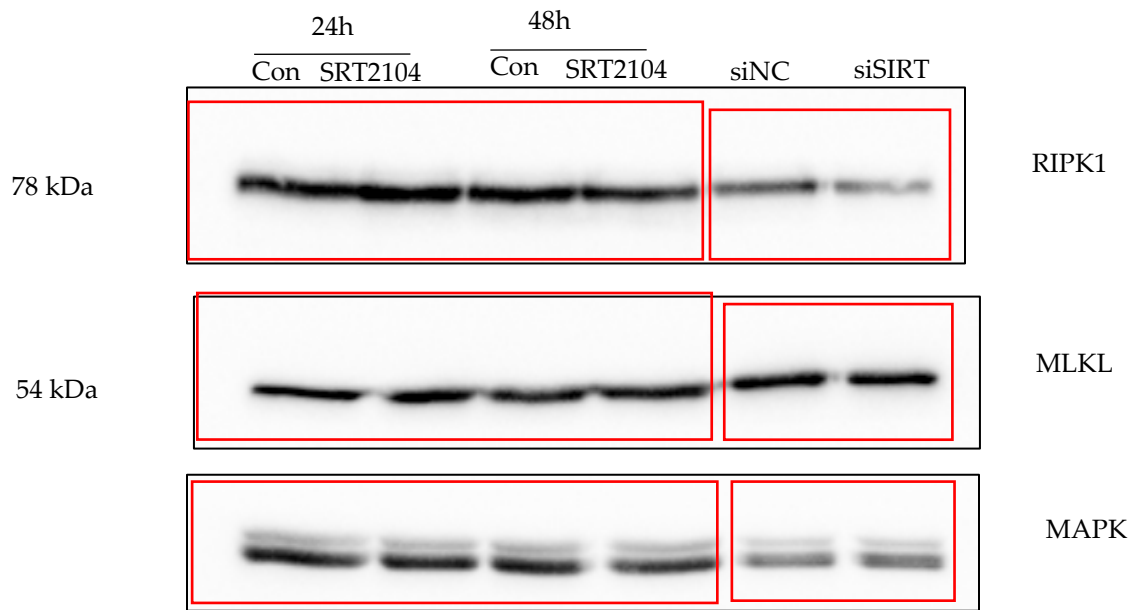

Figure 9

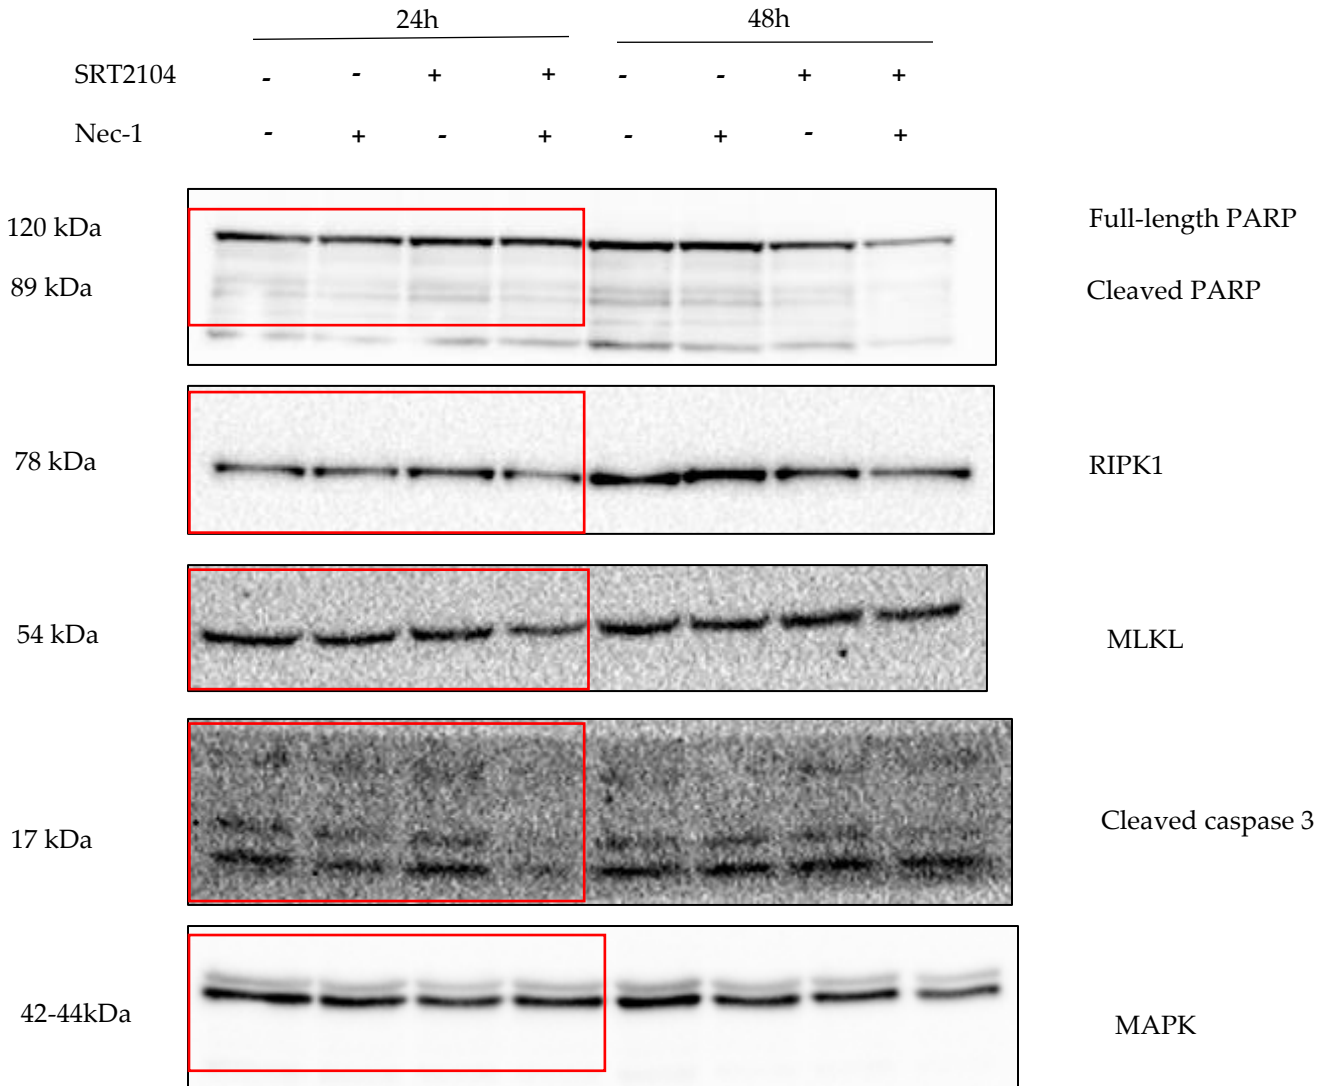

Supplement: 12958_2022_970_MOESM1_ESM.pdf [file 12958_2022_970_MOESM1_ESM.pdf]
