# Supplementary material for: Diverse actions of sirtuin-1 on ovulatory genes and cell death pathways in human granulosa cells
Source: PubMed Central journal article supplement (PMC9284863; doi:10.1186/s12958-022-00970-x), 2022-07-15

# SVOG cells

**A**

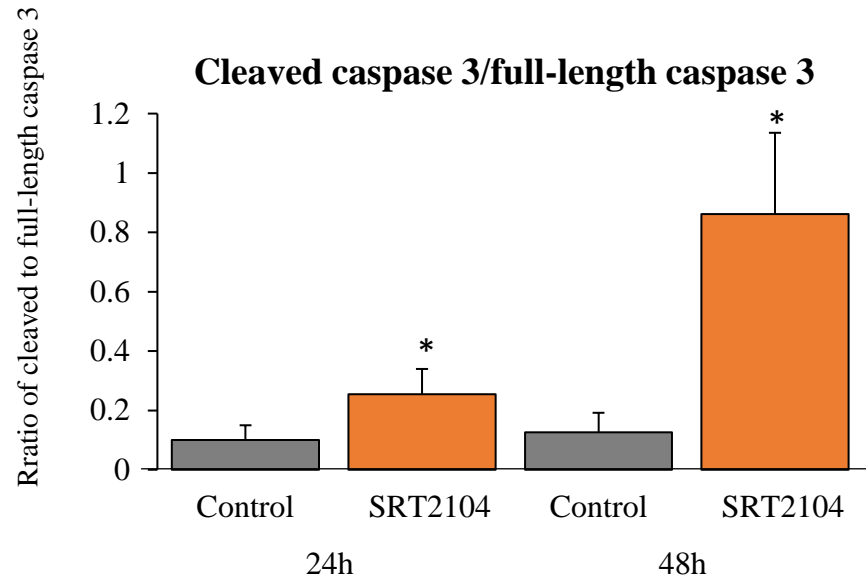

**C**

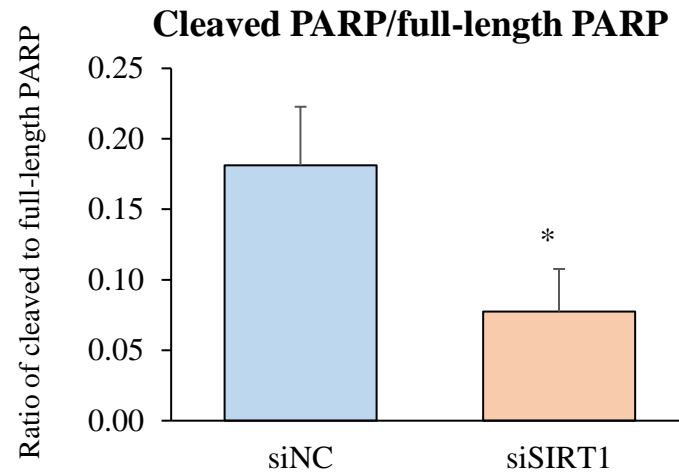

**B**

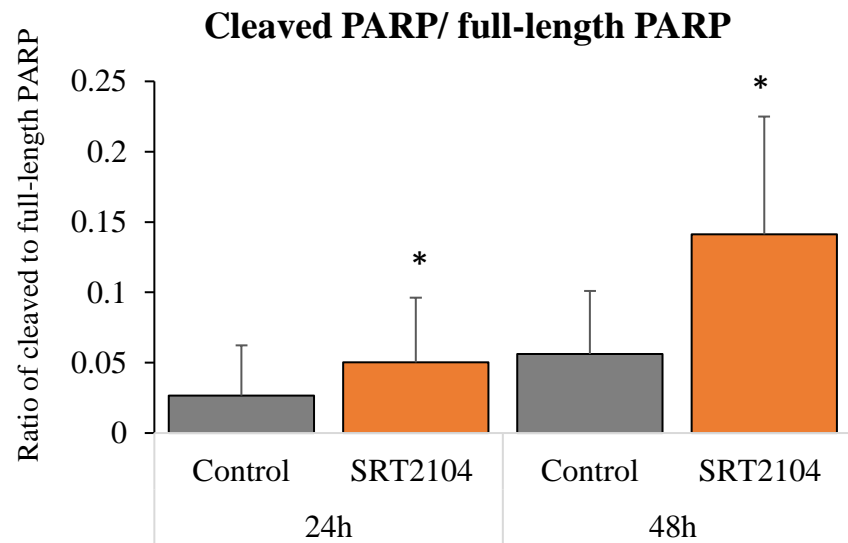

Supplement: 12958_2022_970_MOESM2_ESM.pdf [file 12958_2022_970_MOESM2_ESM.pdf]
